# Supplementary material for: Improving the usability of climate indicator visualizations through diagnostic design principles
Source: Research Square preprint supplement (doi:10.21203/rs.3.rs-203010/v1), 2021-02-18
Supplement: Supplementary file 1 [file 1c8977a3f3318d747ef1db0e.docx]

**Improving the usability of climate indicator visualizations through diagnostic design principles**

*Climatic Change*

Michael D. Gerst1,*, Melissa A. Kenney2,1, Irina Feygina3

1Earth System Science Interdisciplinary Center/Cooperative Institute for Satellite Earth System Studies -Maryland, University of Maryland, 5825 University Research Court, Suite 4001, College Park, MD, 20740-3823, USA

2Institute on the Environment, University of Minnesota, 1954 Buford Ave, Suite 325, Saint Paul, MN, 55108, USA

3Independent Behavioral Science Practitioner for Climate and Clean Energy, New York City, NY, 11217, USA

*corresponding author: [mgerst@umd.edu](mailto:mgerst@umd.edu)

Online Resource 1 contains summary demographic information and the regression tables used in the analysis.

**Table S1.** Demographics of survey respondents (*n* =738).

| Demographic variable | Variable level | Percent of respondents |
| --- | --- | --- |
| Gender | Female | 52.3 |
|  | Male | 47.7 |
|  | Other | 0.0 |
| Ethnicity | White | 82.8 |
|  | Latino | 3.25 |
|  | Black | 5.96 |
|  | Native American | 0.407 |
|  | Asian | 5.96 |
|  | Other | 1.22 |
|  | No answer | 0.407 |
| Party Affiliation | Democrat | 40.7 |
|  | Independent | 27.8 |
|  | Republican | 29.1 |
|  | Other | 2.44 |
| Education Level | Less than a Bachelor’s degree | 12.3 |
|  | Bachelor’s degree | 53.8 |
|  | Master’s degree | 26.7 |
|  | Above a Master’s degree | 7.2 |

**Table S2.** Household-level demographics of survey respondents (*n* =738).

| Household size | 1 | 20.6 |
| --- | --- | --- |
|  | 2 | 41.5 |
|  | 3 | 17.3 |
|  | 4 | 13.8 |
|  | 5+ | 6.78 |
| Household income | 0-20k | 6.5 |
|  | 20-30k | 8.1 |
|  | 30-40k | 8.0 |
|  | 40-50k | 8.0 |
|  | 50-75k | 19.6 |
|  | 75-100k | 19.0 |
|  | 100-125k | 11.7 |
|  | 125-150k | 7.6 |
|  | 150-175k | 2.2 |
|  | 175-200k | 2.3 |
|  | 200k+ | 3.8 |
|  | No answer | 3.3 |

**Table S3.** Results of logistic regression for effects of numeracy, party affiliation, and climate attitudes on ***understandability***. Depending indicator, Treat1 = *AGGI 1, HCDD 1,* or *Temp 1*; Treat2 = *AGGI 2, HCDD 2,* or *Temp 2*; Treat3 = *AGGI 3, HCDD 3,* or *Temp 3*. Each cell shows regression coefficient and standard error (in parenthesis). Stars indicate p-value thresholds: * *p* < 0.05, ** *p* < 0.01, *** *p* < 0.001

| Independent Variables | AGGI | HCDD | Temp |
| --- | --- | --- | --- |
| Treat1 | 0.896 (0.602) | -1.182 (0.621) | -0.222 (0.578) |
| Treat2 | 1.240* (0.609) | 0.376 (0.571) | 0.763 (0.599) |
| Treat3 | 1.131 (0.640) | -0.642 (0.571) | 0.917 (0.631) |
| Numeracy | 0.553** (0.171) | 0.421** (0.160) | 0.195 (0.170) |
| Independent | 0.677 (0.423) | -0.015 (0.393) | -0.265 (0.405) |
| Republican | 1.511** (0.473) | -0.123 (0.442) | -0.829 (0.456) |
| Mostly accepting | -0.221 (0.395) | -0.245 (0.390) | 0.147 (0.436) |
| Mostly skeptical | -0.380 (0.526) | -0.455 (0.484) | 0.531 (0.469) |
| Very Skeptical | -1.151 (0.687) | -0.293 (0.588) | -0.003 (0.588) |
| Treat1*Numeracy | 0.135 (0.237) | 0.145 (0.237) | 0.311 (0.226) |
| Treat2*Numeracy | -0.168 (0.235) | -0.226 (0.226) | -0.248 (0.231) |
| Treat3*Numeracy | 0.101 (0.249) | 0.292 (0.232) | 0.364 (0.248) |
| Treat1*Independent | -1.110 (0.589) | 0.240 (0.570) | 0.513 (0.555) |
| Treat2*Independent | -0.386 (0.592) | -0.614 (0.571) | -0.152 (0.575) |
| Treat3*Independent | -0.545 (0.610) | 0.859 (0.596) | 0.106 (0.627) |
| Treat1*Republican | -0.956 (0.652) | 0.811 (0.609) | 1.386* (0.627) |
| Treat2*Republican | -1.647* (0.644) | -0.750 (0.628) | 1.183 (0.612) |
| Treat3*Republican | -1.210 (0.668) | 0.647 (0.646) | 0.273 (0.657) |
| Treat1*Mostly accepting | -0.136 (0.563) | -0.093 (0.572) | -0.192 (0.568) |
| Treat2*Mostly accepting | 0.364 (0.577) | 0.440 (0.558) | -0.522 (0.584) |
| Treat3*Mostly accepting | -0.148 (0.608) | 0.664 (0.586) | -0.371 (0.639) |
| Treat1*Mostly skeptical | -1.109 (0.742) | 0.156 (0.682) | -1.008 (0.716) |
| Treat2*Mostly skeptical | 0.524 (0.694) | 0.668 (0.698) | -0.747 (0.662) |
| Treat3*Mostly skeptical | -0.325 (0.758) | 0.416 (0.688) | 0.075 (0.731) |
| Treat1*Very skeptical | 0.538 (0.869) | 0.163 (0.766) | -0.273 (0.779) |
| Treat2*Very skeptical | 0.401 (0.868) | 0.813 (0.805) | -0.848 (0.795) |
| Treat3*Very skeptical | 0.761 (0.888) | 0.899 (0.859) | 0.050 (0.861) |
| Constant | -1.517*** (0.444) | -0.308 (0.394) | -0.656 (0.436) |
| Log Likelihood | -448.588 | -456.692 | -453.015 |
| Akaike Inf. Crit. | 953.176 | 969.383 | 962.030 |

**Table S4.** Results of linear regression for effects of numeracy, party affiliation, and climate attitudes on ***subjective response***. Depending indicator, Treat1 = *AGGI 1, HCDD 1,* or *Temp 1*; Treat2 = *AGGI 2, HCDD 2,* or *Temp 2*; Treat3 = *AGGI 3, HCDD 3,* or *Temp 3*. Each cell shows regression coefficient and standard error (in parenthesis). Stars indicate p-value thresholds: * *p* < 0.05, ** *p* < 0.01, *** *p* < 0.001

| Independent Variables | AGGI | HCDD | Temp |
| --- | --- | --- | --- |
| Treat1 | 0.272 (0.419) | 0.043 (0.470) | 0.817* (0.324) |
| Treat2 | 0.338 (0.406) | -0.483 (0.444) | -0.054 (0.386) |
| Treat3 | 0.908* (0.407) | -0.373 (0.404) | 0.564 (0.338) |
| Numeracy | 0.022 (0.115) | 0.058 (0.108) | 0.164 (0.103) |
| Independent | 0.057 (0.289) | -0.544* (0.248) | -0.223 (0.260) |
| Republican | 0.808** (0.280) | 0.157 (0.312) | 0.112 (0.283) |
| Mostly accepting | -0.138 (0.262) | -0.293 (0.266) | -0.147 (0.258) |
| Mostly skeptical | -0.301 (0.315) | -0.577 (0.323) | -0.727* (0.283) |
| Very Skeptical | -0.991* (0.446) | -0.759 (0.419) | -0.961* (0.394) |
| Treat1*Numeracy | 0.003 (0.152) | -0.395* (0.165) | -0.164 (0.129) |
| Treat2*Numeracy | 0.296 (0.152) | 0.025 (0.165) | -0.023 (0.149) |
| Treat3*Numeracy | 0.025 (0.154) | 0.218 (0.151) | -0.114 (0.129) |
| Treat1*Independent | -0.121 (0.397) | 0.190 (0.401) | 0.022 (0.340) |
| Treat2*Independent | -0.320 (0.373) | 0.372 (0.386) | 0.176 (0.390) |
| Treat3*Independent | -0.376 (0.381) | 1.020** (0.379) | 0.322 (0.338) |
| Treat1*Republican | -0.376 (0.394) | 0.001 (0.450) | 0.224 (0.375) |
| Treat2*Republican | -0.705 (0.379) | 0.037 (0.467) | 0.363 (0.372) |
| Treat3*Republican | -0.648 (0.385) | -0.053 (0.440) | -0.150 (0.374) |
| Treat1*Mostly accepting | -0.065 (0.363) | 0.091 (0.414) | 0.086 (0.331) |
| Treat2*Mostly accepting | -0.257 (0.348) | 0.571 (0.391) | -0.282 (0.353) |
| Treat3*Mostly accepting | -0.214 (0.349) | 0.343 (0.400) | -0.017 (0.331) |
| Treat1*Mostly skeptical | -0.396 (0.466) | 0.453 (0.497) | 0.099 (0.447) |
| Treat2*Mostly skeptical | -0.600 (0.412) | 0.234 (0.488) | -0.197 (0.439) |
| Treat3*Mostly skeptical | -0.435 (0.431) | 0.207 (0.454) | 0.436 (0.379) |
| Treat1*Very skeptical | 0.033 (0.561) | 0.510 (0.564) | 0.193 (0.483) |
| Treat2*Very skeptical | -0.261 (0.563) | 0.315 (0.571) | -0.217 (0.514) |
| Treat3*Very skeptical | 0.381 (0.548) | -0.005 (0.548) | 0.520 (0.495) |
| Constant | 3.835*** (0.311) | 3.685*** (0.291) | 4.190*** (0.260) |
| R2 | 0.114 | 0.099 | 0.160 |
| Adjusted R2 | 0.079 | 0.063 | 0.127 |

**Table S5.** Results of linear regression for effects of numeracy, party affiliation, and climate attitudes on ***trust***. Depending indicator, Treat1 = *AGGI 1, HCDD 1,* or *Temp 1*; Treat2 = *AGGI 2, HCDD 2,* or *Temp 2*; Treat3 = *AGGI 3, HCDD 3,* or *Temp 3*. Each cell shows regression coefficient and standard error (in parenthesis). Stars indicate p-value thresholds: * *p* < 0.05, ** *p* < 0.01, *** *p* < 0.001

| Independent Variables | AGGI | HCDD | Temp |
| --- | --- | --- | --- |
| Treat1 | 0.472* (0.224) | -0.014 (0.241) | 0.387 (0.212) |
| Treat2 | 0.379 (0.233) | -0.004 (0.234) | 0.141 (0.227) |
| Treat3 | 0.448 (0.244) | -0.152 (0.206) | 0.009 (0.238) |
| Numeracy | 0.106 (0.059) | 0.032 (0.052) | 0.169** (0.060) |
| Independent | 0.059 (0.180) | -0.106 (0.148) | -0.273 (0.157) |
| Republican | 0.127 (0.135) | 0.141 (0.155) | -0.056 (0.144) |
| Mostly accepting | -0.042 (0.162) | -0.210 (0.140) | -0.167 (0.162) |
| Mostly skeptical | -0.265 (0.171) | -0.529** (0.178) | -0.508*** (0.145) |
| Very Skeptical | -0.860** (0.268) | -0.811** (0.251) | -0.882*** (0.241) |
| Treat1*Numeracy | -0.244** (0.084) | -0.172 (0.088) | -0.198* (0.086) |
| Treat2*Numeracy | 0.031 (0.088) | 0.001 (0.089) | -0.051 (0.084) |
| Treat3*Numeracy | -0.084 (0.090) | 0.027 (0.082) | -0.244** (0.086) |
| Treat1*Independent | -0.094 (0.239) | -0.288 (0.246) | 0.271 (0.225) |
| Treat2*Independent | -0.343 (0.232) | 0.063 (0.238) | -0.071 (0.232) |
| Treat3*Independent | -0.253 (0.250) | 0.102 (0.230) | 0.534* (0.221) |
| Treat1*Republican | -0.126 (0.213) | -0.242 (0.243) | 0.173 (0.217) |
| Treat2*Republican | -0.225 (0.202) | 0.122 (0.241) | 0.042 (0.208) |
| Treat3*Republican | 0.026 (0.224) | -0.018 (0.229) | 0.135 (0.223) |
| Treat1*Mostly accepting | -0.134 (0.218) | 0.112 (0.238) | -0.035 (0.219) |
| Treat2*Mostly accepting | -0.270 (0.212) | -0.021 (0.216) | -0.166 (0.216) |
| Treat3*Mostly accepting | -0.188 (0.223) | 0.392 (0.218) | 0.247 (0.231) |
| Treat1*Mostly skeptical | -0.160 (0.254) | 0.399 (0.287) | 0.071 (0.267) |
| Treat2*Mostly skeptical | -0.485* (0.235) | -0.187 (0.278) | -0.325 (0.247) |
| Treat3*Mostly skeptical | -0.397 (0.265) | 0.209 (0.247) | 0.281 (0.232) |
| Treat1*Very skeptical | -0.053 (0.348) | 0.403 (0.350) | -0.321 (0.327) |
| Treat2*Very skeptical | -0.542 (0.343) | -0.492 (0.347) | -0.327 (0.312) |
| Treat3*Very skeptical | -0.204 (0.368) | -0.098 (0.354) | 0.150 (0.350) |
| Constant | 2.773*** (0.171) | 2.878*** (0.134) | 2.951*** (0.155) |
| R2 | 0.214 | 0.160 | 0.215 |
| Adjusted R2 | 0.184 | 0.127 | 0.185 |
